# Supplementary material
Source: Springer Nature journal article supplement (https://www.springermedizin.de/resource/supplementary/13058_2012_3211_MOESM3_ESM.pdf/9703500)
Supplement: MOESM3 [file 9703500]

## Early breast cancer patient (n=254)

| <b>Molecular profiles</b> | <i>HER2</i><br>Adna<br>Test | <i>MUC1</i><br>Adna<br>Test | <i>GA733-2</i><br>Adna<br>Test | <i>CK19</i> | <i>CK19</i><br>multiplex | <i>HER2</i><br>multiplex | <i>MAGE</i><br><i>A3</i> |
|---------------------------|-----------------------------|-----------------------------|--------------------------------|-------------|--------------------------|--------------------------|--------------------------|
| n=18 (7.1%)               | +                           | -                           | -                              | -           | -                        | -                        | -                        |
| n=6 (2.4%)                | -                           | +                           | -                              | -           | -                        | -                        | -                        |
| n=4 (1.6%)                | -                           | -                           | +                              | -           | -                        | -                        | -                        |
| n=14 (5.5%)               | -                           | -                           | -                              | +           | -                        | -                        | -                        |
| n=8 (3.2%)                | -                           | -                           | -                              | -           | +                        | -                        | -                        |
| n=20 (7.9%)               | -                           | -                           | -                              | -           | -                        | +                        | -                        |
| n=7 (2.8%)                | -                           | -                           | -                              | -           | -                        | -                        | +                        |
| n=3 (1.2%)                | +                           | +                           | -                              | -           | -                        | -                        | -                        |
| n=2 (0.8%)                | +                           | -                           | -                              | +           | -                        | -                        | -                        |
| n=1 (0.4%)                | +                           | -                           | -                              | -           | +                        | -                        | -                        |
| n=1 (0.4%)                | +                           | -                           | -                              | -           | -                        | +                        | -                        |
| n=3 (1.2%)                | -                           | +                           | +                              | -           | -                        | -                        | -                        |
| n=1 (0.4%)                | -                           | +                           | -                              | -           | -                        | +                        | -                        |
| n=9 (3.5%)                | -                           | -                           | -                              | +           | +                        | -                        | -                        |
| n=2 (0.8%)                | -                           | -                           | -                              | +           | -                        | +                        | -                        |
| n=2 (0.8%)                | -                           | -                           | -                              | +           | -                        | -                        | +                        |
| n=1 (0.4%)                | +                           | -                           | -                              | -           | +                        | +                        | -                        |
| n=1 (0.4%)                | -                           | +                           | +                              | +           | -                        | -                        | -                        |
| n=1 (0.4%)                | -                           | -                           | +                              | -           | +                        | -                        | -                        |
| n=2 (0.8%)                | -                           | -                           | -                              | +           | +                        | +                        | -                        |
| n=2 (0.8%)                | -                           | -                           | -                              | +           | +                        | -                        | +                        |
| n=1 (0.4%)                | -                           | -                           | -                              | +           | +                        | +                        | +                        |
| n=145 (57.1%)             | -                           | -                           | -                              | -           | -                        | -                        | -                        |
